# Supplementary material for: Similarity searches in genome-wide numerical data sets
Source: Springer Nature journal article supplement (doi:10.1186/1745-6150-1-13), 2006-05-30
Supplement: Additional file 3 [file 1745-6150-1-13-s3.pdf]

**Table 1. Unreported connections to flagellar phenotype based on contextual information from STRING database.**

| COG number                                                                           | STRING prediction                                                                                                             |
|--------------------------------------------------------------------------------------|-------------------------------------------------------------------------------------------------------------------------------|
| COG1699: Uncharacterized protein conserved in bacteria                               | Prediction is based on conserved neighborhood: COG1344, flagellin and related hook-associated protein                         |
| COG2257: Uncharacterized homolog of the cytoplasmic domain of flagellar protein FhlB | Prediction is based on coexpression with COG1344, flagellin and related hook-associated proteins                              |
| COG3034: Uncharacterized protein conserved in bacteria                               | Prediction is based on coexpression with COG2257, uncharacterized homolog of the cytoplasmic domain of flagellar protein FhlB |

**Table 2. The average number of iterations, unique matches (detected by psi-square alone), and matches found by both psi-square and 5%-ED method.**

| <b>CORR./K</b>      | <b>IT</b> | <b>MATCHES</b> | <b>SHARED</b> | <b>PSI-SQUARE ONLY</b> | <b>5%ED ONLY</b> |
|---------------------|-----------|----------------|---------------|------------------------|------------------|
| cor07_step05        | 1.1       | 508.3          | 418           | 605                    | 1                |
| cor07_step10        | 2.1       | 513.6          | 418           | 605                    | 1                |
| cor07_step15        | 1.7       | 509.4          | 418           | 605                    | 1                |
| cor07_step20        | 1.3       | 508.4          | 418           | 605                    | 1                |
| cor07_step25        | 1.1       | 508.3          | 418           | 605                    | 1                |
| cor07_step30        | 1.1       | 508.3          | 418           | 605                    | 1                |
| cor07_step35        | 1         | 508.1          | 418           | 605                    | 1                |
| cor07_step40        | 1         | 508.1          | 418           | 605                    | 1                |
| cor08_step05        | 1.7       | 339.7          | 418           | 356                    | 1                |
| cor08_step10        | 3.7       | 352.7          | 418           | 358                    | 1                |
| cor08_step15        | 2.1       | 339.1          | 418           | 356                    | 1                |
| cor08_step20        | 2.4       | 338.1          | 418           | 356                    | 1                |
| cor08_step25        | 1.3       | 334.9          | 418           | 356                    | 1                |
| cor08_step30        | 1.6       | 335.9          | 418           | 356                    | 1                |
| cor08_step35        | 1.4       | 336            | 418           | 356                    | 1                |
| cor08_step40        | 1.3       | 335            | 418           | 356                    | 1                |
| cor09_step05        | 3.3       | 193.1          | 408           | 125                    | 11               |
| cor09_step10        | 3.3       | 188.1          | 409           | 169                    | 10               |
| <b>cor09_step15</b> | <b>4</b>  | <b>196.4</b>   | <b>409</b>    | <b>187</b>             | <b>10</b>        |
| cor09_step20        | 3.1       | 189.3          | 410           | 160                    | 9                |
| cor09_step25        | 2         | 179.3          | 408           | 152                    | 11               |
| cor09_step30        | 2.4       | 183            | 407           | 150                    | 12               |
| cor09_step35        | 1.9       | 180.6          | 407           | 164                    | 12               |
| cor09_step40        | 2         | 177.4          | 407           | 151                    | 12               |

**Table 3. Properties of proteins in two HPs set. Proteins in HP<sub>s1</sub> were found only by psi-square; and proteins in HP<sub>s2</sub> were found by both, psi-square and 5%ED approaches.**

| SET              | Protein length | TM regions | %Loop regions | %Helical regions |
|------------------|----------------|------------|---------------|------------------|
| HP <sub>s1</sub> | 888.39±8.33    | 1.17±0.02  | 91.08±0.13    | 8.92±0.13        |
| HP <sub>s2</sub> | 929.08±6.85    | 1.28±0.02  | 94.09±0.07    | 5.85±0.07        |

**Table 4. Predicted molecular functions for the two groups of proteins.**

| <b>HPs1 set: proteins found only by psi-square</b> |                                                                |                                                     | <b>HPs12 set: proteins found by both: the psi-square and 5%ED methods</b> |                                                                |                                                                                        |
|----------------------------------------------------|----------------------------------------------------------------|-----------------------------------------------------|---------------------------------------------------------------------------|----------------------------------------------------------------|----------------------------------------------------------------------------------------|
| <b>ID in PlasmoDB</b>                              | <b>Ortholog in Plasmodium yoelii (1: presence, 0: absence)</b> | <b>Putative function (based on PSI-BLAST score)</b> | <b>ID in PlasmoDB</b>                                                     | <b>Ortholog in Plasmodium yoelii (1: presence, 0: absence)</b> | <b>Putative function (based on PSI-BLAST score)</b>                                    |
| MAL13P1.102                                        | 1                                                              |                                                     | MAL13P1.109                                                               | 1                                                              | Protein kinase domain                                                                  |
| MAL13P1.152                                        | 1                                                              |                                                     | MAL13P1.114                                                               | 1                                                              | Protein kinase domain                                                                  |
| MAL13P1.158                                        | 1                                                              |                                                     | MAL13P1.130                                                               | 1                                                              |                                                                                        |
| MAL13P1.268                                        | 0                                                              | Distantly related to portion of CLAG domain         | MAL13P1.188                                                               | 1                                                              |                                                                                        |
| MAL6P1.100                                         | 1                                                              |                                                     | MAL13P1.228                                                               | 1                                                              |                                                                                        |
| MAL6P1.121                                         | 0                                                              | Tetrahydrofolate dehydrogenase/cyclohydr olase      | MAL13P1.278                                                               | 1                                                              | Protein kinase domain                                                                  |
| MAL6P1.127                                         | 1                                                              | Enzyme with alpha/beta hydrolase fold               | MAL13P1.308                                                               | 1                                                              | Armadillo/beta-catenin repeats                                                         |
| MAL6P1.174                                         | 1                                                              |                                                     | MAL13P1.328                                                               | 1                                                              |                                                                                        |
| MAL6P1.200                                         | 1                                                              |                                                     | MAL13P1.94                                                                | 1                                                              |                                                                                        |
| MAL6P1.63                                          | 0                                                              |                                                     | MAL6P1.145                                                                | 1                                                              | CDP-alcohol phosphatidyltransferase (probably ethanolamine or choline-specific) family |
| MAL7P1.13                                          | 0                                                              |                                                     | MAL6P1.147                                                                | 1                                                              | HECT-domain ubiquitination enzyme                                                      |
| MAL7P1.167                                         | 0                                                              |                                                     | MAL6P1.178                                                                | 1                                                              |                                                                                        |
| MAL7P1.34                                          | 0                                                              |                                                     | MAL6P1.216                                                                | 1                                                              | TPR domain                                                                             |
| MAL8P1.160                                         | 1                                                              |                                                     | MAL6P1.247                                                                | 1                                                              |                                                                                        |
| MAL8P1.4                                           | 1                                                              |                                                     | MAL6P1.286                                                                | 1                                                              | Myosin-like coiled coil                                                                |
| MAL8P1.88                                          | 0                                                              | PFEMP-like protein?                                 | MAL6P1.289                                                                | 1                                                              |                                                                                        |
| PF07_0014                                          | 0                                                              |                                                     | MAL6P1.299                                                                | 1                                                              | membrane protein PF12                                                                  |
| PF07_0107                                          | 0                                                              |                                                     | MAL7P1.119                                                                | 0                                                              |                                                                                        |
| PF08_0082                                          | 1                                                              |                                                     | MAL7P1.125                                                                | 1                                                              |                                                                                        |
| PF08_0083                                          | 0                                                              |                                                     | MAL7P1.84                                                                 | 1                                                              |                                                                                        |
| PF08_0091                                          | 1                                                              |                                                     | MAL8P1.106                                                                | 1                                                              |                                                                                        |
| PF08_0115                                          | 1                                                              | DnaJ domain                                         | MAL8P1.109                                                                | 1                                                              | Protein phosphatase 2C                                                                 |
| PF08_0118                                          | 1                                                              |                                                     | MAL8P1.12                                                                 | 0                                                              |                                                                                        |
| PF10_0023                                          | 1                                                              |                                                     | MAL8P1.13                                                                 | 1                                                              |                                                                                        |

|           |   |                                                                           |            |   |                                                                             |
|-----------|---|---------------------------------------------------------------------------|------------|---|-----------------------------------------------------------------------------|
| PF10_0098 | 0 |                                                                           | MAL8P1.150 | 1 | Adenylate or Guanylate cyclase                                              |
| PF10_0100 | 1 |                                                                           | MAL8P1.73  | 1 |                                                                             |
| PF10_0157 | 0 |                                                                           | PF07_0072  | 1 | Protein kinase with calmodulin domain                                       |
| PF10_0163 | 0 |                                                                           | PF07_0127  | 1 |                                                                             |
| PF10_0170 | 1 |                                                                           | PF08_0129  | 1 | Protein phosphatase 2B-like, calcineurin-like phosphoesterase               |
| PF10_0189 | 1 | Cys finger                                                                | PF10_0034  | 1 |                                                                             |
| PF10_0223 | 1 | Cys finger                                                                | PF10_0037  | 1 |                                                                             |
| PF10_0231 | 1 |                                                                           | PF10_0094  | 1 | Tubulin-tyrosine ligase family                                              |
| PF10_0296 | 0 |                                                                           | PF10_0119  | 1 |                                                                             |
| PF11_0151 | 1 | TBC1 domain, Rab GTPase activator                                         | PF10_0135  | 0 |                                                                             |
| PF11_0300 | 1 |                                                                           | PF10_0138  | 1 |                                                                             |
| PF11_0304 | 1 |                                                                           | PF10_0156  | 1 |                                                                             |
| PF11_0398 | 0 |                                                                           | PF10_0193  | 1 | Microtubule associated protein 1A/1B, light chain, aka autophagy 8i protein |
| PF11_0402 | 1 | RRM RNA recognition motif                                                 | PF10_0220  | 1 | Phospholipid scramblase                                                     |
| PF11_0441 | 1 | Eenzyme with alpha/beta hydrolase fold                                    | PF10_0281  | 1 | NOA36-like repeats, also in microneme protein 4                             |
| PF11_0513 | 1 | DnaJ domain                                                               | PF10_0295  | 1 |                                                                             |
| PF11_0528 | 1 |                                                                           | PF10_0306  | 1 | Membrane Occupation and Recognition Nexus (MORN) repeat                     |
| PF13_0012 | 1 | ETRAMP                                                                    | PF10_0308  | 1 | OTU-like cysteine protease                                                  |
| PF13_0031 | 1 |                                                                           | PF10_0345  | 1 |                                                                             |
| PF13_0072 | 1 |                                                                           | PF10_0348  | 1 | PFEMP-1 family                                                              |
| PF13_0079 | 1 |                                                                           | PF10_0352  | 1 |                                                                             |
| PF13_0159 | 1 | Nucleotidyl transferase, possibly nicotinate-nucleotide adenyltransferase | PF13_0162  | 0 |                                                                             |
| PF13_0162 | 1 |                                                                           | PF10_0367  | 0 |                                                                             |
| PF13_0162 | 1 |                                                                           | PF10_0368  | 1 | Dynamamin GTPase effector domain                                            |
| PF14_0013 | 1 | DnaJ domain                                                               | PF11_0060  | 1 | Ca/calmodulin-dependent protein kinase domain                               |
| PF14_0016 | 1 | ETRAMP                                                                    | PF11_0094  | 1 |                                                                             |
| PF14_0044 | 1 |                                                                           | PF11_0168  | 1 | Lipase/serine esterase                                                      |
| PF14_0045 | 1 |                                                                           | PF11_0180  | 1 |                                                                             |
| PF14_0108 | 1 |                                                                           | PF11_0193  | 0 |                                                                             |
| PF14_0250 | 1 | Lipase class 3                                                            | PF11_0194  | 1 |                                                                             |
| PF14_0291 | 0 |                                                                           | PF11_0204  | 0 |                                                                             |
| PF14_0344 | 0 |                                                                           | PF11_0277  | 1 |                                                                             |
| PF14_0472 | 0 |                                                                           | PF11_0278  | 1 |                                                                             |
| PF14_0525 | 1 | Dual specificity protein phosphatase                                      | PF11_0287  | 1 | CRAL/TRIO lipid-binding domain                                              |

|           |   |                                                    |           |   |                                                                        |
|-----------|---|----------------------------------------------------|-----------|---|------------------------------------------------------------------------|
|           |   | (S/T and Y)                                        |           |   |                                                                        |
| PF14_0574 | 1 | Zn finger, FYVE-type                               | PF11_0344 | 1 | pfam02430, AMA-1, Apical membrane antigen 1                            |
| PF14_0594 | 0 |                                                    | PF11_0373 | 1 | PFEMP                                                                  |
| PF14_0712 | 1 |                                                    | PF11_0379 | 1 |                                                                        |
| PF14_0733 | 1 |                                                    | PF11_0383 | 1 |                                                                        |
| PF14_0734 | 1 | Protein kinase domain                              | PF11_0415 | 1 |                                                                        |
| PF14_0760 | 0 |                                                    | PF11_0417 | 0 |                                                                        |
| PFA0135w  | 1 | Tryptophan-rich secreted blood-stage antigen       | PF11_0464 | 1 | pfam00069, pkinase, Protein kinase domain                              |
| PFA0215w  | 0 |                                                    | PF11_0474 | 0 |                                                                        |
| PFA0635c  | 0 |                                                    | PF13_0115 | 1 |                                                                        |
| PFB0105c  | 1 |                                                    | PF13_0173 | 1 |                                                                        |
| PFB0106c  | 0 |                                                    | PF13_0197 | 1 | merozoite surface protein 7 precursor                                  |
| PFB0120w  | 1 | ETRAMP                                             | PF13_0255 | 1 |                                                                        |
| PFB0145c  | 1 |                                                    | PF13_0256 | 1 |                                                                        |
| PFB0190c  | 1 | TPR/SEL-1 repeat                                   | PF13_0314 | 1 | PFEMP                                                                  |
| PFB0194w  | 1 |                                                    | PF13_0326 | 0 | pfam00241, cofilin_ADF, Cofilin/tropomyosin-type actin-binding protein |
| PFB0485c  | 0 |                                                    | PF14_0021 | 1 |                                                                        |
| PFB0900c  | 1 |                                                    | PF14_0102 | 1 | Pr86 rhoptry precursor protein                                         |
| PFB0910w  | 1 | Merozoite Surface Antigen 2 (MSA-2) family         | PF14_0135 | 1 |                                                                        |
| PFC0090w  | 1 |                                                    | PF14_0149 | 1 |                                                                        |
| PFC0695w  | 1 |                                                    | PF14_0172 | 1 |                                                                        |
| PFC0930c  | 1 |                                                    | PF14_0173 | 1 | pfam00027, cNMP_binding, Cyclic nucleotide-binding domain              |
| PFD0495c  | 1 |                                                    | PF14_0196 | 1 | TPR Domain                                                             |
| PFD0705c  | 1 |                                                    | PF14_0224 | 1 | PP1-like serine/threonine phosphatase, calcineurin-like                |
| PFD0985w  | 1 | PR repeat                                          | PF14_0293 | 0 |                                                                        |
| PFD1135c  | 0 | Solute carrier family 5 (choline transporter)      | PF14_0333 | 1 |                                                                        |
| PFD1165w  | 1 | Protein kinase domain                              | PF14_0334 | 1 | Glutamate synthase, FMN-binding domain                                 |
| PFE0360c  | 1 |                                                    | PF14_0346 | 1 | cyclic nucleotide-dependent protein kinase                             |
| PFE1255w  | 1 | SMC-RecF/N family ATPases (chromosome segregation) | PF14_0388 | 1 |                                                                        |
| PFE1505w  | 0 |                                                    | PF14_0495 | 1 |                                                                        |
| PFI0120c  | 1 | Protein kinase domain                              | PF14_0572 | 1 |                                                                        |

|             |   |                                                       |           |   |                                                                           |
|-------------|---|-------------------------------------------------------|-----------|---|---------------------------------------------------------------------------|
| PFI0845w    | 1 |                                                       | PF14_0578 | 0 |                                                                           |
| PFI0850w    | 0 | Phosphatidylserine decarboxylase                      | PF14_0586 | 1 | MORN domain                                                               |
| PFI1200w    | 0 |                                                       | PF14_0607 | 1 |                                                                           |
| PFI1520w    | 0 |                                                       | PF14_0652 | 1 | D13 Zn-finger protein                                                     |
| PFI1720w    | 0 |                                                       | PF14_0660 | 1 | Ser/Thr phosphatase, calcineurin-like                                     |
| PFL0065w    | 0 |                                                       | PF14_0694 | 0 | thioredoxin, protein disulphide isomerase                                 |
| PFL0275w    | 1 | Zinc finger, C3HC4 type (RING finger)                 | PF14_0732 | 1 |                                                                           |
| PFL0800c    | 1 |                                                       | PFB0150c  | 1 | pfam00069, protein kinase domain                                          |
| PFL0895c    | 1 | Dynamin family GTPase (role in endocytosis)           | PFB0305c  | 1 | merozoite surface protein MSP5                                            |
| PFL1055c    | 0 |                                                       | PFB0475c  | 1 |                                                                           |
| PFL1945c    | 1 | ETRAMP                                                | PFB0570w  | 1 | annotated as "altered trompospondin domain", in fact not so similar to it |
| PFL2530w    | 1 | alpha/beta hydrolase fold, probably lysophospholipase | PFB0680w  | 1 |                                                                           |
| PFL2565w    | 1 |                                                       | PFB0815w  | 1 | protein kinase with EF-hand                                               |
| MAL13P1.329 | 1 |                                                       | PFB0935w  | 1 | CLAG, Cytoadherence-linked asexual protein                                |
| MAL6P1.300  | 1 | PP-loop superfamily ATPase-pyrophosphatase            | PFC0120w  | 1 | CLAG, Cytoadherence-linked asexual protein                                |
| PF07_0011   | 1 | Modified HMA (heavy metal chaperone) domain           | PFC0560c  | 1 |                                                                           |
| PFC0150w    | 1 | Lipin, mutations cause fatty acid depletion in mice   | PFC0820w  | 1 |                                                                           |
| PFD0715c    | 1 |                                                       | PFC0945w  | 1 | pfam00069, pkinase, Protein kinase domain                                 |
| PFE0200c    | 1 | Zinc finger (AN1-like) family                         | PFD0100c  | 1 |                                                                           |
| PFE0340c    | 1 | Rhomboid-family intramembrane protease                | PFD0105c  | 1 |                                                                           |
| PFE0070w    | 1 |                                                       | PFD0195c  | 1 |                                                                           |
|             |   |                                                       | PFD0230c  | 1 | Papain family cysteine protease                                           |
|             |   |                                                       | PFD0295c  | 1 | pfam00084, sushi, Sushi domain (SCR repeat)                               |
|             |   |                                                       | PFD0380c  | 1 |                                                                           |
|             |   |                                                       | PFD0385w  | 1 |                                                                           |
|             |   |                                                       | PFD0390c  | 0 | AAA family ATPase                                                         |
|             |   |                                                       | PFD0955w  | 0 |                                                                           |
|             |   |                                                       | PFD1100c  | 1 |                                                                           |
|             |   |                                                       | PFE0045c  | 1 | pfam00069, pkinase, Protein kinase domain                                 |

|  |  |  |          |   |                                                                                      |
|--|--|--|----------|---|--------------------------------------------------------------------------------------|
|  |  |  | PFE0075c | 1 | rhoptry-associated protein                                                           |
|  |  |  | PFE0080c | 1 | rhoptry-associated protein                                                           |
|  |  |  | PFE0175c | 1 | Myosin head motor domain ATPase (NOT non-specific coiled coil domain)                |
|  |  |  | PFE0365c | 1 |                                                                                      |
|  |  |  | PFE0770w | 1 |                                                                                      |
|  |  |  | PFE1105c | 1 |                                                                                      |
|  |  |  | PFE1120w | 1 |                                                                                      |
|  |  |  | PFE1130w | 1 | DUF803 family, maybe a transporter most similar to nucleotide-sugar transporters     |
|  |  |  | PFE1260c | 1 |                                                                                      |
|  |  |  | PFE1410c | 1 |                                                                                      |
|  |  |  | PFE1415w | 0 | DHHC/NEW1 zinc finger domain, including palmitoyl transferases                       |
|  |  |  | PFI0175w | 1 |                                                                                      |
|  |  |  | PFI0265c | 1 | rhoptry complex protein                                                              |
|  |  |  | PFI0360c | 1 |                                                                                      |
|  |  |  | PFI0410c | 1 |                                                                                      |
|  |  |  | PFI0540w | 1 |                                                                                      |
|  |  |  | PFI0690c | 1 |                                                                                      |
|  |  |  | PFI0785c | 1 | Transporter, major facilitator superfamily                                           |
|  |  |  | PFI1005w | 1 | ADP-ribosylation factor family                                                       |
|  |  |  | PFI1015w | 1 | CRAL/TRIO lipid-binding domain                                                       |
|  |  |  | PFI1445w | 1 | Rhoptry complex protein                                                              |
|  |  |  | PFI1475w | 0 | Merozoite surface protein MSP-1                                                      |
|  |  |  | PFI1550c | 1 |                                                                                      |
|  |  |  | PFI1685w | 1 | Protein kinase C family                                                              |
|  |  |  | PFL0300c | 0 | Ser/Thr protein phosphatase, calcineurin-like                                        |
|  |  |  | PFL0320w | 0 |                                                                                      |
|  |  |  | PFL0840c | 1 |                                                                                      |
|  |  |  | PFL1090w | 1 | Toxoplasma gliding-associated protein homolog45                                      |
|  |  |  | PFL1110c | 1 | Cyclic nucleotide-binding domain                                                     |
|  |  |  | PFL1165w | 0 |                                                                                      |
|  |  |  | PFL1365w | 1 |                                                                                      |
|  |  |  | PFL1435c | 1 | Myosin head motor domain ATPase (NOT non-specific coiled coil domain)                |
|  |  |  | PFL1515c | 0 |                                                                                      |
|  |  |  | PFL1565c | 1 |                                                                                      |
|  |  |  | PFL1700c | 1 | Vacuolar-type H <sup>+</sup> -translocating inorganic H <sup>+</sup> pyrophosphatase |
|  |  |  | PFL2215w | 1 | Actin                                                                                |

|  |  |          |   |                           |
|--|--|----------|---|---------------------------|
|  |  | PFL2225w | 1 | Calmodulin-like protein   |
|  |  | PFL2460w | 1 | Coronin-type WD-40 repeat |
|  |  | PFL2510w | 1 | Chitinase                 |
