# Supplementary material for: Similarity searches in genome-wide numerical data sets
Source: Springer Nature journal article supplement (doi:10.1186/1745-6150-1-13), 2006-05-30
Supplement: Additional file 5 [file 1745-6150-1-13-s5.pdf]

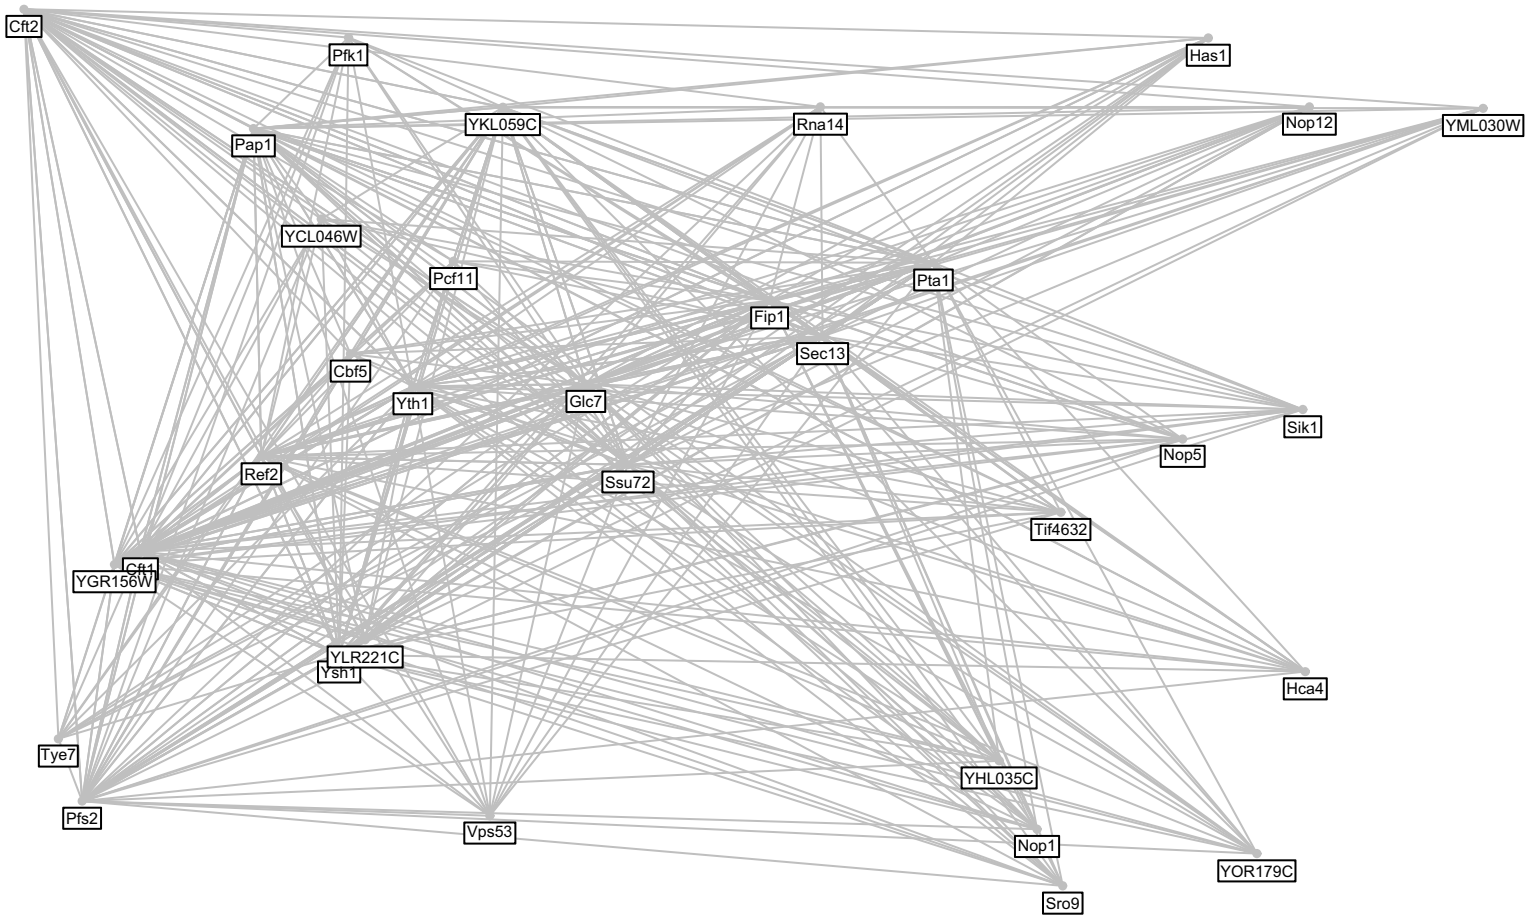

Figure. Factors likely regulating Poly(A)-tail synthesis and maturation, found by psi-square using purification as a query.
